# Supplementary material for: Electricity Recovery from Municipal Sewage Wastewater Using a Hydrogel Complex Composed of Microbially Reduced Graphene Oxide and Sludge
Source: MDPI journal article supplement (doi:10.3390/ma9090742), 2016-08-31
Supplement: s1 [file s1]

# Supplementary Materials: Electricity Recovery from Municipal Sewage Wastewater Using a Hydrogel Complex Composed of Microbially Reduced Graphene Oxide and Sludge

Naoko Yoshida, Yasushi Miyata, Ai Mugita and Kazuki Iida

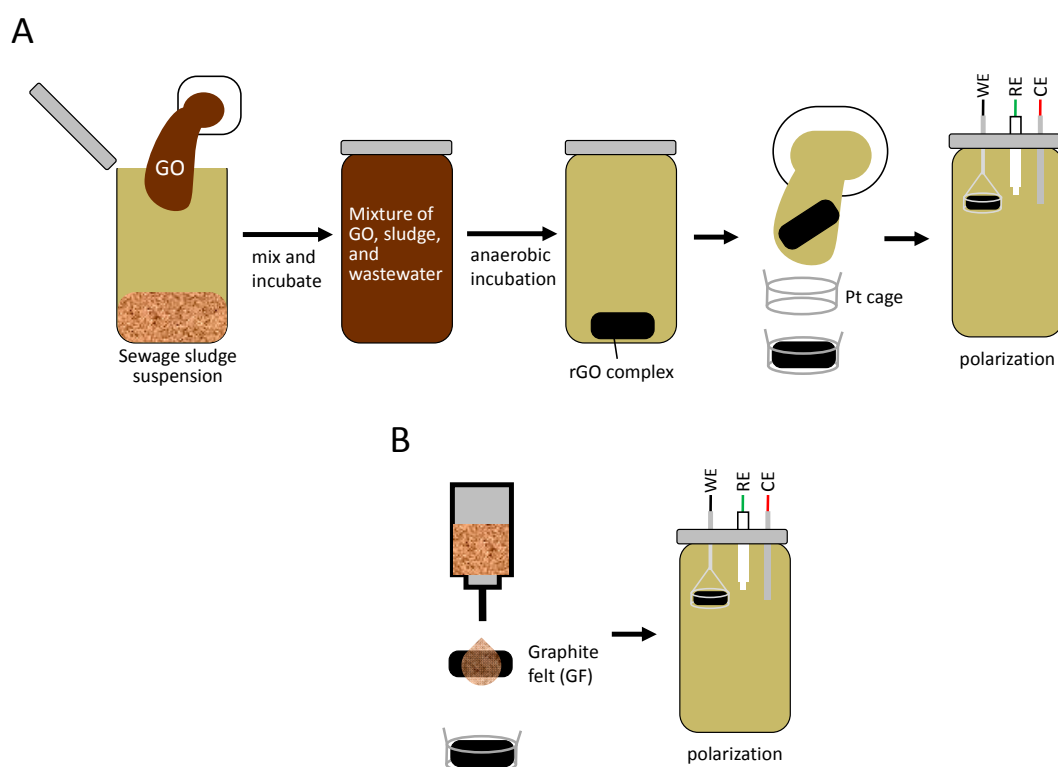

**Figure S1.** Schematic representation of the experiments performed in this study. The preparation and polarization procedures for the sludge-carbon complexes using graphene oxide (A) and graphite felt (B) are shown.

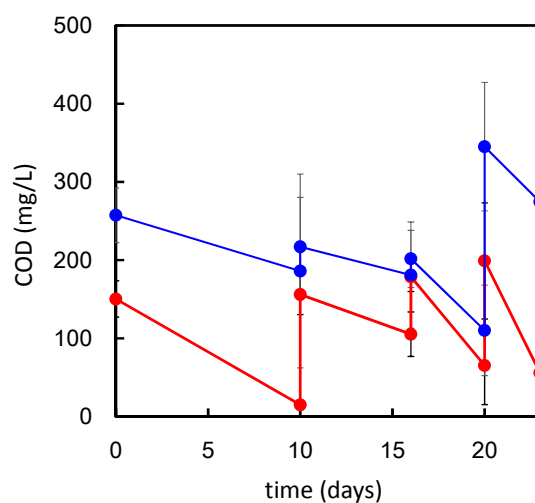

**Figure S2.** Changes of COD concentrations in the electrochemically cultivated cultures using two different complexes with rGO (red) and GF (blue).

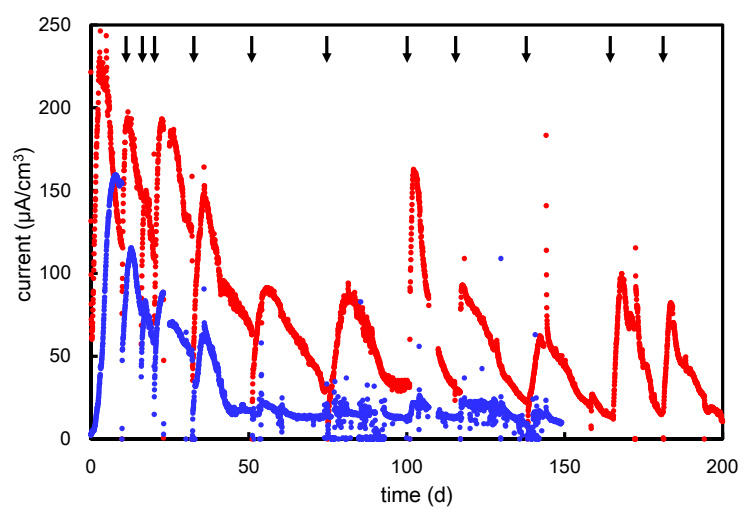

**Figure S3.** Long-term polarization of the rGO-sludge (red) and GF-sludge (blue) complexes in sewage wastewater. The arrows indicate the timing of wastewater replacements.
